# Supplementary figures and images for: Unplanned 30-Day Readmissions: Hospital Data Warehouse Modelling.
Source: Research Square preprint supplement (doi:10.21203/rs.3.rs-274754/v1), 2021-03-16

# *Supplementary material: 10 most important features by models.*


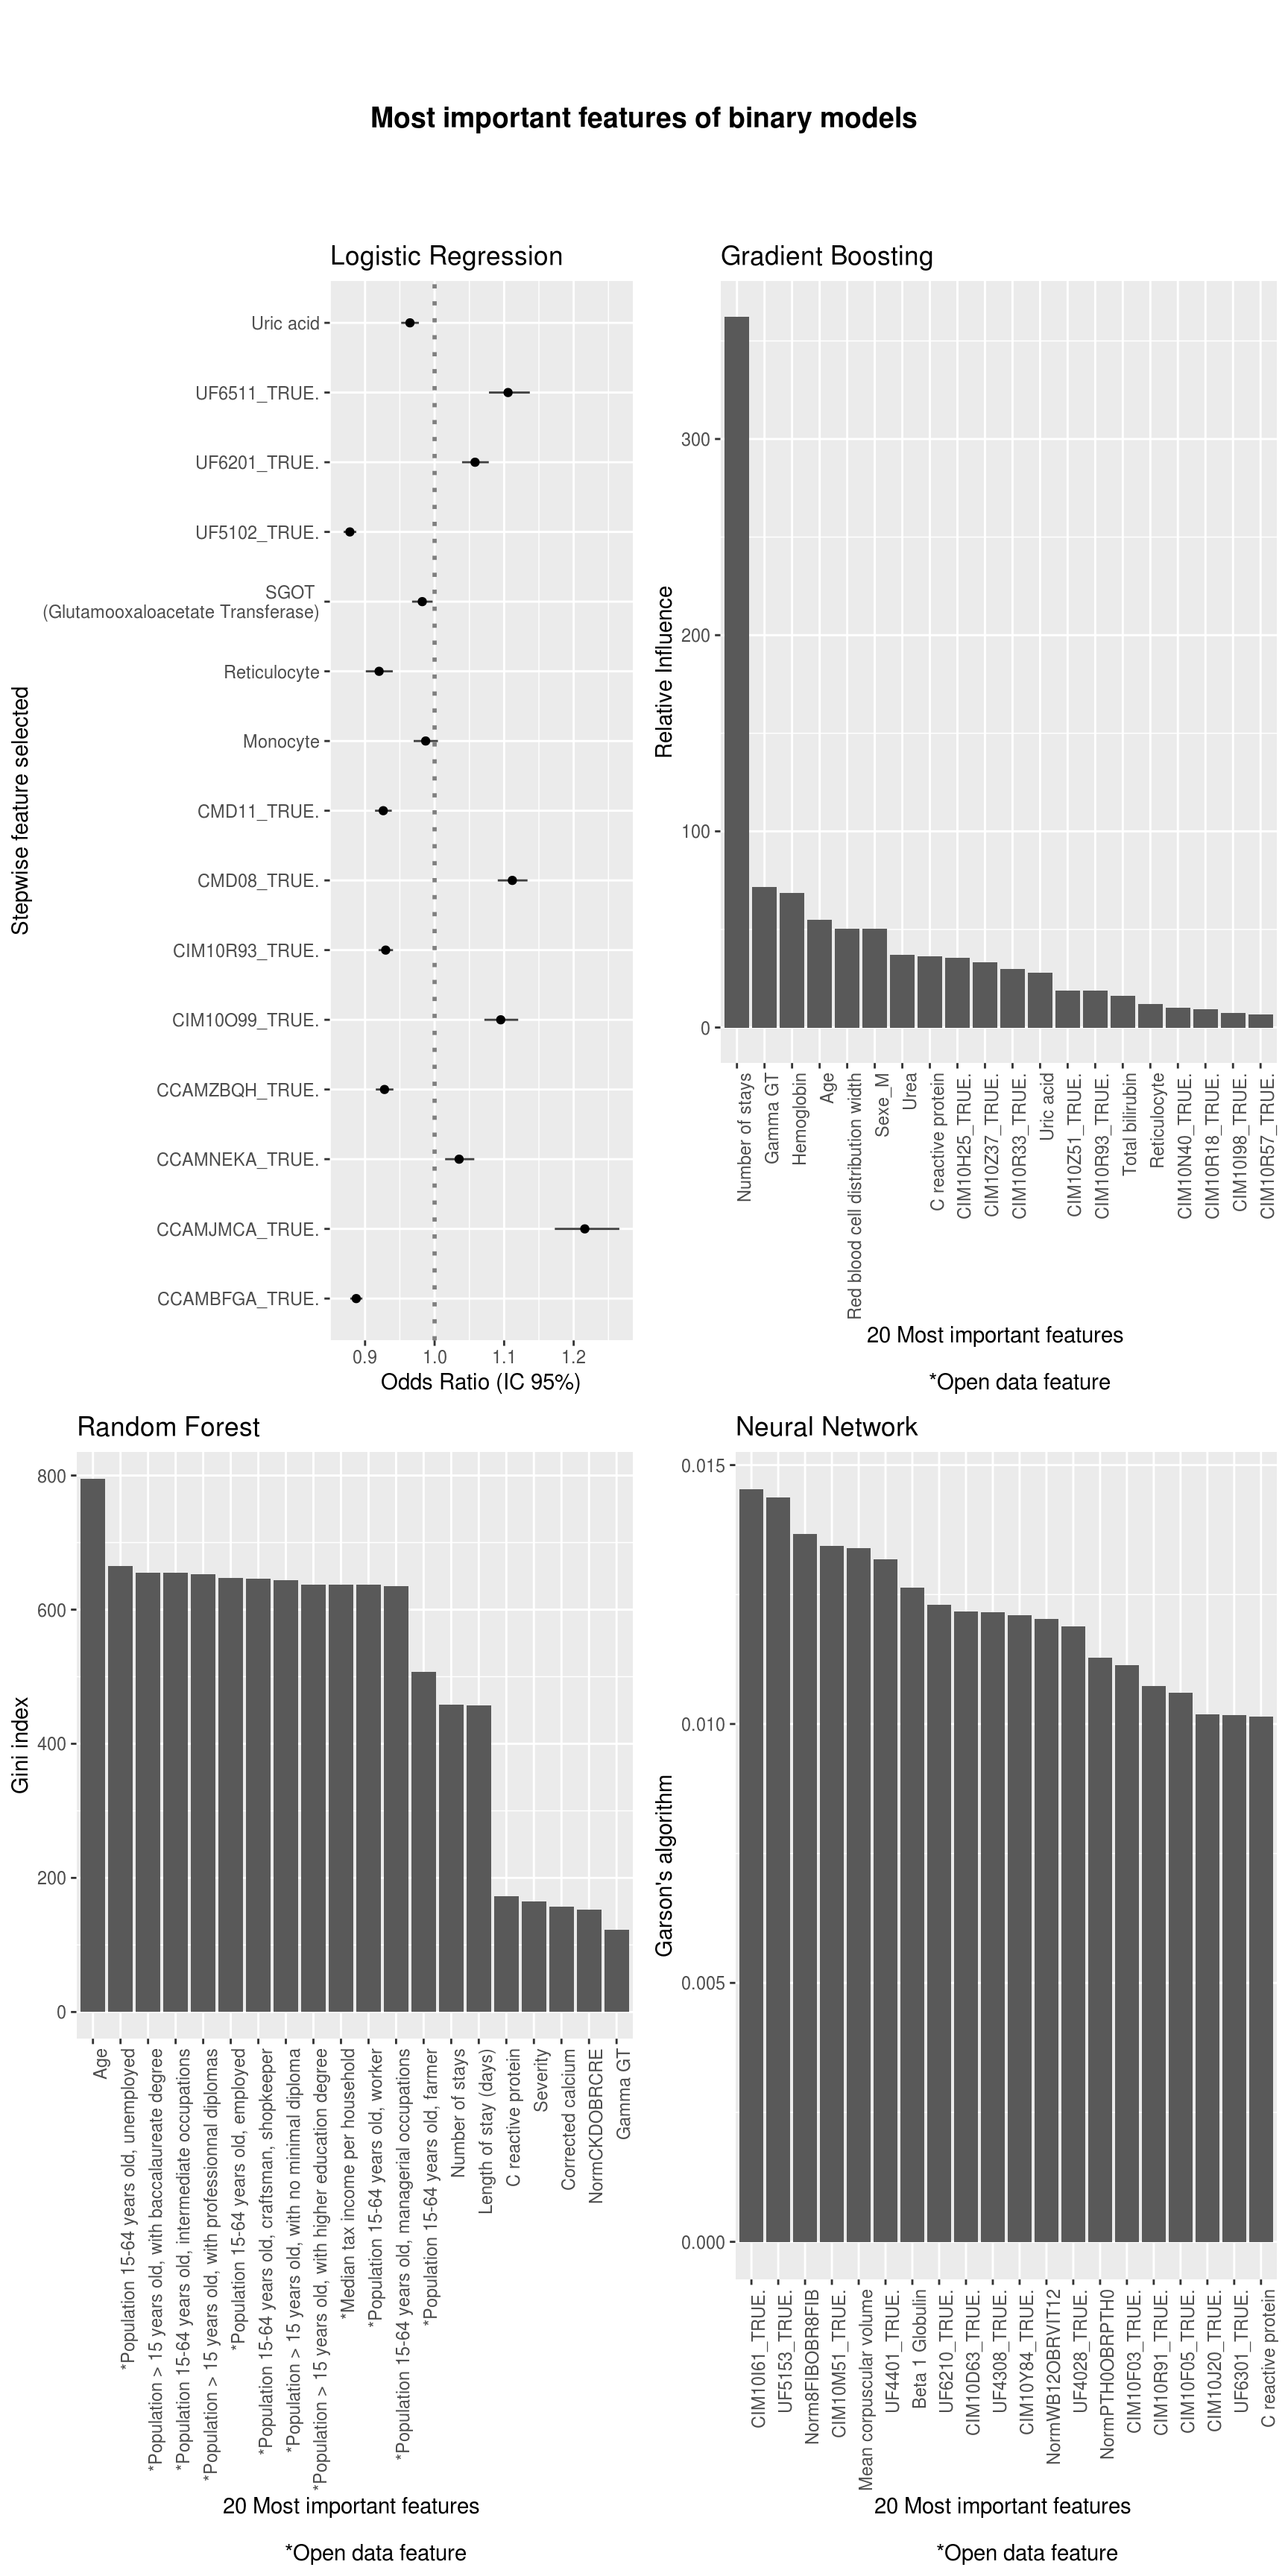


**, in Rennes.**


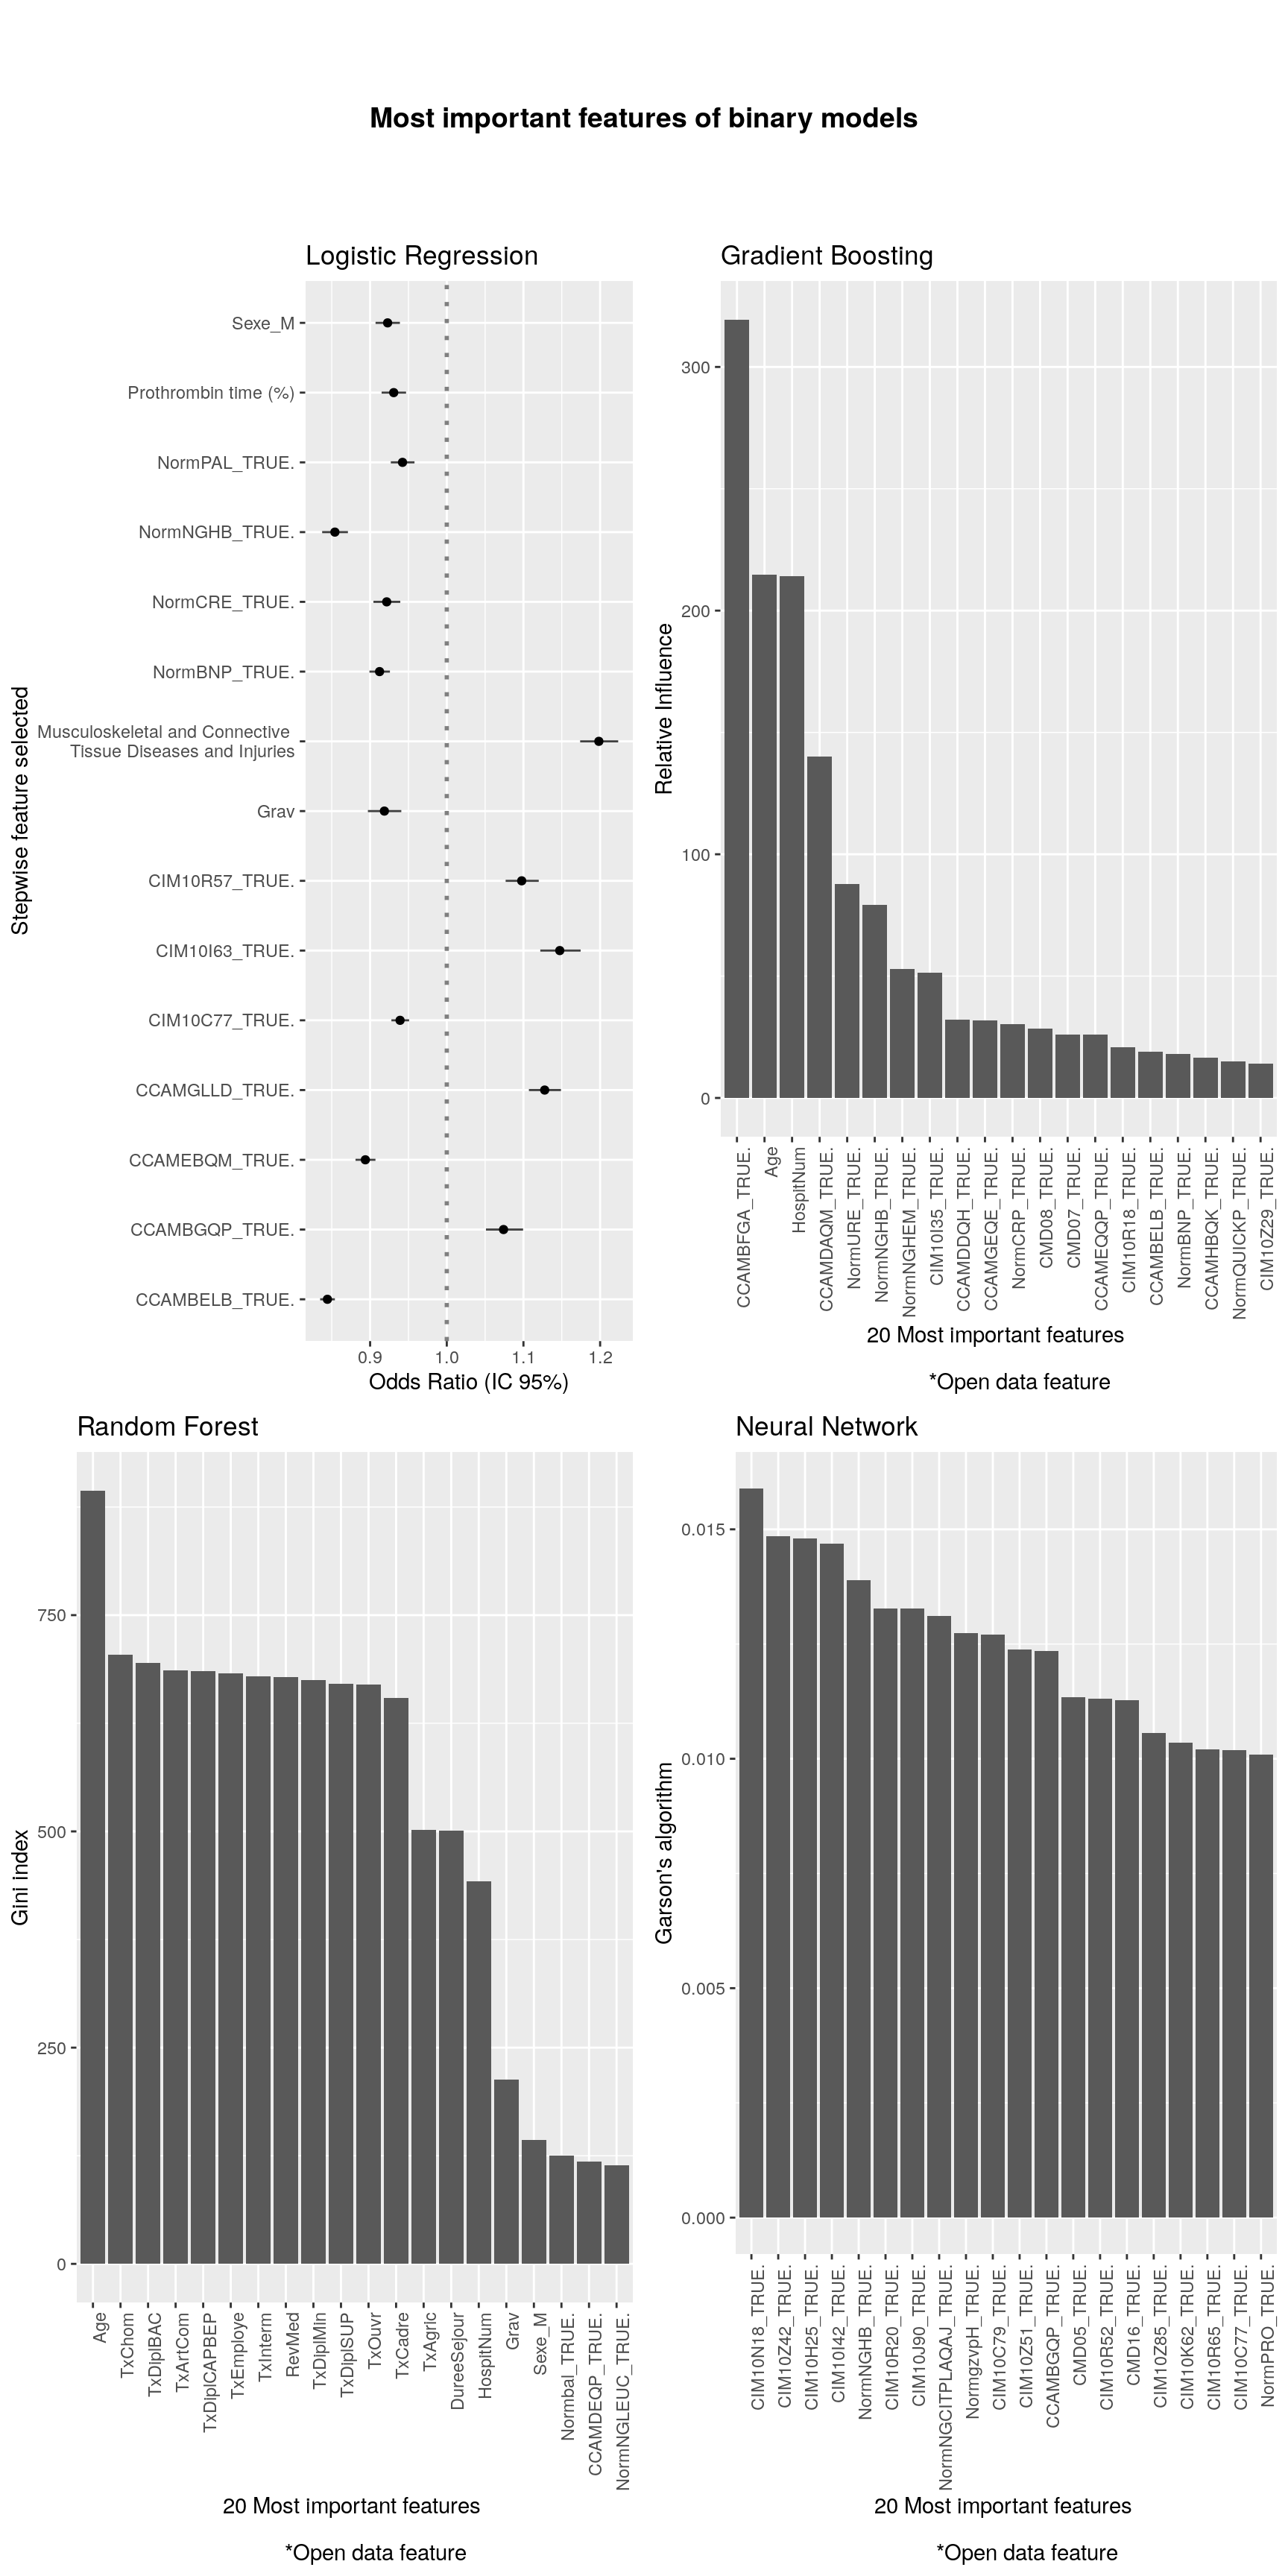


**, in Tours.**

Supplement: Supplementary file 1 [file 8f1c4545b3fbd32a457eddb9.docx]
